# Supplementary material for: Long-Chain Hydrosilanes Mediated Phase Transfer of Aqueous Metal Nanoparticles
Source: MDPI journal article supplement (doi:10.3390/macromol2020009), 2022-03-29
Supplement: s1 [file s1]

Archive with 1 entries (1 files):
- macromol-1632967-supplementary.pdf
